# Supplementary material for: Estimations of statistical dependence as joint return period modulator of compound events – Part 1: Storm surge and wave height
Source: Copernicus journal article supplement (doi:10.5194/nhess-18-1937-2018), 2018-07-12
Supplement: Supplementary file 2 [file nhess-18-1937-2018-supplement.zip]

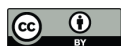

## *Supplement of*

# **Estimations of statistical dependence as joint return period modulator of compound events – Part 1: Storm surge and wave height**

**Thomas I. Petroliaqkis**

*Correspondence to:* Thomas I. Petroliaqkis ([thomas.petroliaqkis@ec.europa.eu](mailto:thomas.petroliaqkis@ec.europa.eu))

- [nhess-18-1937-2018-supplement-title-page.pdf](#)
- [Statistical-Supplement\\_final.pdf](#)
- [Technical-Supplement\\_final.pdf](#)

The copyright of individual parts of the supplement might differ from the CC BY 3.0 License.
