# Supplementary material for: Estimations of statistical dependence as joint return period modulator of compound events – Part 1: Storm surge and wave height
Source: Copernicus journal article supplement (doi:10.5194/nhess-18-1937-2018), 2018-07-12
Supplement: Supplementary file 3 [file nhess-18-1937-2018-supplement.zip]

Archive with 3 entries (3 files):
- Statistical-Supplement_final.pdf
- nhess-18-1937-2018-supplement-title-page.pdf
- Technical-Supplement_final.pdf
